# Supplementary material for: Social capital to strengthen health policy and health systems
Source: Oxford University Press journal article supplement (doi:10.1093/heapol/czt087), 2013-11-23
Supplement: czt087_Supplementary_Data.zip [file czt087_Supplementary_Data.zip]

# Renforcement des politiques et des systèmes de santé

Accepté le 11 octobre 2013

Cet article explique l'évolution d'un modèle pour le développement du capital social, modèle élaboré au cours d'actions concentrées sur la stigmatisation et la discrimination des malades du VIH, sur la maternité sans risque et sur la santé reproductive. Grâce à davantage d'engagement et ce en s'appuyant sur des documents pertinents, la nature du capital social est étudiée et nous permet de comprendre pourquoi s'engager dans un tel concept peut améliorer les politiques et les programmes de santé, peut aussi améliorer les conseils prodigués et peut rendre la gouvernance plus efficace, tout cela dans le but d'améliorer le projet de renforcement du système de santé (RSS). Le concept du capital social suggère de faciliter, de façon systématique et concrète, l'intégration des opinions de la collectivité dans le processus de décisions politiques concernant la santé. Ceci permet de renforcer l'efficacité du programme, ainsi que la responsabilité et la gouvernance du système de santé. Parce que le développement du capital social facilite la communication et l'essor de nouvelles idées, ainsi que les règles et les normes intra et inter réseaux professionnels, il peut fournir un mécanisme solide pour l'intégration intra ou inter secteurs, un procédé qui fut longtemps considéré comme un « problème pernicieux » par les responsables politiques. Cet article démontre que l'application systématique du capital social, de la création de liens menant au capital social, peut considérablement améliorer la capacité des gouvernements et de leurs partenaires à atteindre les objectifs du RSS.

Mots clés : Capital social, Systèmes de santé, Politique de santé, Gouvernance, Responsabilité
