# Supplementary material for: Social capital to strengthen health policy and health systems
Source: Oxford University Press journal article supplement (doi:10.1093/heapol/czt087), 2013-11-23
Supplement: czt087_Supplementary_Data.zip [file czt087_Supplementary_Data.zip]

## 用社会资本强化医疗政策以及医疗系统

本文详细记述了一个建立社会资本模型的发展历程,这个模型最初产生于对艾滋病相关的污名与歧视,母亲安全以及生殖健康的干预之中。通过对相关文献的进一步探究,本文探寻了社会资本的本质,并提出为什么建立社会资本这一过程可以提高医疗政策和医疗项目水平,以及强化医疗系统的主张和政府管理。提出的社会资本建立过程对系统化的、有效得将社区声音融合进医疗政策制定的过程中是有促进作用的——它加强了项目有效性以及医疗系统的责任和政府管理。因为社会资本的建立促进了各职业实践社区之中和之间的交流以及新观点、新规则、新标准的接纳,它提供了一种重要机制,为部门之中和部门之间的整合——一个医疗政策制定者长久来无法被破解的迷局。本文认为,社会资本建立的系统性应用,从联系到为社会资本的连接搭建桥梁,可以显著提高政府及政府合作者的能力,达到医疗系统强化的目标。
