# Supplementary material for: Social capital to strengthen health policy and health systems
Source: Oxford University Press journal article supplement (doi:10.1093/heapol/czt087), 2013-11-23
Supplement: czt087_Supplementary_Data.zip [file czt087_Supplementary_Data.zip]

## **El capital social para fortalecer la política y los sistemas de salud**

Jessica Ogden, Ken Morrison y Karen Hardee

**Aceptado** 11 de octubre de 2013

Este artículo relata el desarrollo de un modelo para la creación de capital social que se desarrolla en el transcurso de las intervenciones que se centraron en el estigma y la discriminación relacionados con el VIH, la maternidad sin riesgo y la salud reproductiva. Utilizando la literatura relevante, este artículo explora la naturaleza del capital social y sugiere por qué la realización de este proceso puede mejorar la política y los programas de salud, la promoción y la gobernanza para mejorar los resultados del fortalecimiento de los sistemas de salud (FSS). El proceso de capital social propuesto facilita la inclusión sistemática y efectiva de las voces de la comunidad en el proceso de la política de salud – fortaleciendo la eficacia del programa, así como la responsabilidad y la gobernanza del sistema de salud. Debido a que la construcción de capital social facilita la comunicación y la captación de nuevas ideas, normas y estándares dentro y entre comunidades profesionales de práctica, puede proveer un mecanismo importante de integración tanto dentro como entre sectores – un proceso largo considerado un "problema perverso" para los diseñadores de políticas de salud. El artículo sostiene que la aplicación sistemática de creación de capital social, desde una vinculación, pasando por una conexión hasta llegar a una unión de capital social, puede mejorar enormemente la capacidad de los gobiernos y sus asociados para lograr sus objetivos de FSS.

**Palabras Claves:** Capital social, sistemas de salud, políticas de salud, gobernanza, responsabilidad

### **Mensajes Claves**

- La experiencia de campo relacionada con la lucha contra el estigma y la discriminación relacionados con el VIH, respaldada por la comprensión actual del capital social, llevó al desarrollo de un modelo simple de tres pasos para la creación de capital social.
- Este modelo se puede aplicar para ayudar a fortalecer las políticas y los programas de salud a través de la promoción, el análisis participativo de políticas y la gobernanza para mejorar los resultados de FSS.
- La formación de capital social alcanza estos resultados mediante la creación de vínculos entre las comunidades, conectándolas entre sí, y uniéndolas a sistemas sociales que toman decisiones de salud, entre otros temas.
- Estas conexiones también ocurren dentro de las comunidades de prácticas del sistema de salud para mejorar la comunicación y abrir el camino para la introducción de nuevas ideas, normas y prácticas.
- La creación de capital social a través de los sectores de desarrollo social puede apoyar la integración de estos sectores para mejorar el desarrollo social en general.
